# Supplementary material for: Tuning interfaces between Cu and oxide via atomic layer deposition method for CO2 hydrogenation to methanol
Source: Royal Society of Chemistry journal article supplement (doi:10.1039/d3cy01221b), 2023-12-02
Supplement: d3cy01221b1.pdf [file d3cy01221b1.pdf]

# Electronic Supplementary Information

## Tuning Interfaces between Cu and Oxide via Atomic Layer Deposition Method for CO<sub>2</sub> Hydrogenation to Methanol

Kun Jiang,<sup>a</sup> Huibo Zhao,<sup>a</sup> Yang Chen,<sup>a</sup> Baozhen Li,<sup>a</sup> Zhang Zhang,<sup>a</sup> Fenghai Cao,<sup>a</sup> Lizhi  
Wu,<sup>a</sup> Yu Tang,<sup>a</sup> Tiesen Li,<sup>\*bc</sup> Li Tan<sup>\*a</sup>

<sup>a</sup> *Institute of Molecule Catalysis and In-situ/operando Studies, College of Chemistry, Fuzhou  
University, Fuzhou 350108, China*

<sup>b</sup> *National Engineering Research Center of Chemical Fertilizer Catalyst, College of Chemical  
Engineering, Fuzhou University, Fuzhou 350116, China*

<sup>c</sup> *Qingyuan Innovation Laboratory, Quanzhou 362801, China*

E-mail: litiesen@fzu.edu.cn

E-mail: tan@fzu.edu.cn

## 1. Experimental

### 1.1. Materials

Copper (II) nitrate trihydrate ( $\text{Cu}(\text{NO}_3)_2 \cdot 3\text{H}_2\text{O}$ , 98.0-103%) was purchased from Sigma-Aldrich, Zinc nitrate hexahydrate ( $\text{Zn}(\text{NO}_3)_2 \cdot 6\text{H}_2\text{O}$ , 99%), Aluminum nitrate nonahydrate ( $\text{Al}(\text{NO}_3)_3 \cdot 9\text{H}_2\text{O}$ , 99%) and Zinc oxide ( $\text{ZnO}$ , 99.8%) were purchased from Aladdin. Cerium (III) nitrate hexahydrate ( $\text{Ce}(\text{NO}_3)_3 \cdot 6\text{H}_2\text{O}$ , 99%), Sodium Hydroxide ( $\text{NaOH}$ , AR) and Diethylzinc solution ( $(\text{C}_2\text{H}_5)_2\text{Zn}$ , 1.0 M in Hexane) were obtained from Sinopharm and Macklin, respectively.

### 1.2. Catalysts preparation

**Synthesis of  $\text{CeO}_2$  nanorods:** The  $\text{CeO}_2$  nanorods were synthesized by hydrothermal method as reported previously.<sup>1</sup> Typically, 3.472 g  $\text{Ce}(\text{NO}_3)_3 \cdot 6\text{H}_2\text{O}$  was dissolved in 20 mL deionized water and 38.4 g  $\text{NaOH}$  was dissolved in 140 mL deionized water, respectively. After the dissolution completed, the cerium nitrate solution was pumped dropwise slowly into the sodium hydroxide under vigorous stirring. After being stirred for another 30 min, the obtained slurry was transferred into 250 mL stainless steel autoclave with a Teflon liner, followed the temperature was kept at 100 °C for 24 h. After that, the precipitation was washed with deionized water to pH = 7, followed by drying in an oven at 80 °C overnight. Finally, the samples were calcined in a muffle furnace at 400 °C for 4 h.

**Synthesis of  $\text{Cu/CeO}_2$  catalyst:** 10 wt.%  $\text{Cu/CeO}_2$  catalyst was prepared by incipient wetness impregnation. The required quantity of  $\text{Cu}(\text{NO}_3)_2 \cdot 3\text{H}_2\text{O}$  was dissolved in the exact amount of deionized water and added in a dropwise manner,

according to the absorption capacity of the CeO<sub>2</sub> nanorods. The obtained paste was then dried overnight at 80 °C and calcined at 400 °C for 4 h in a muffle furnace.

**ZnO deposition by ALD:** Based on the synthesis of Cu/CeO<sub>2</sub> catalyst, ZnO was deposited by homemade ALD reactor (closed chamber-type) with ultrahigh purity N<sub>2</sub> as a carrier gas. ZnO deposition was executed at 150 °C, using diethylzinc and deionized water as precursors. For each ALD cycle, the pulses, exposure, and purge times for (C<sub>2</sub>H<sub>5</sub>)<sub>2</sub>Zn were 0.02 s, 8 s, 25 s, and those for deionized water were 0.1 s, 8 s, 30 s, respectively. Cu/xc-ZnO/CeO<sub>2</sub> catalysts were prepared by depositing ZnO with various numbers of cycles on the CeO<sub>2</sub> nanorods (x = 5, 10, 20), followed by impregnating Cu. Similarly, xc-ZnO/Cu/xc-ZnO/CeO<sub>2</sub> catalysts were prepared by further deposition ZnO on Cu/xc-ZnO/CeO<sub>2</sub>. xc-ZnO/Cu/CeO<sub>2</sub> catalysts were obtained by depositing ZnO on the Cu/CeO<sub>2</sub> for comparison. In total, four catalysts were synthesized: Cu/10c-ZnO/CeO<sub>2</sub>, Cu/20c-ZnO/CeO<sub>2</sub>, 5c-ZnO/Cu/5c-ZnO/CeO<sub>2</sub> and 10c-ZnO/Cu/CeO<sub>2</sub>.

**Synthesis of other catalysts:** Cu/10c-ZnO/CeO<sub>2</sub> show the highest CH<sub>3</sub>OH production, so in this work we focus on catalysts promoted by 10 cycles of ALD-ZnO. The catalysts with same composition of metal element content were prepared as follows. Cu/ZnO/CeO<sub>2</sub>-co catalyst was prepared by co-precipitation method according to the procedure described elsewhere.<sup>2</sup> Cu/ZnO/CeO<sub>2</sub>-IWI and Cu/ZnO catalysts were prepared by incipient wetness impregnation method as above the synthesis method of Cu/CeO<sub>2</sub>. All the catalysts were dried overnight and calcined in air for 4 h at 400 °C. Meanwhile, commercial Cu/ZnO/Al<sub>2</sub>O<sub>3</sub> was also synthesized by co-precipitation

method, in which molar ratio of Cu/Zn/Al was 6: 3: 1. Typically, a certain amount of  $\text{Cu}(\text{NO}_3)_2 \cdot 3\text{H}_2\text{O}$ ,  $\text{Zn}(\text{NO}_3)_2 \cdot 6\text{H}_2\text{O}$  and  $\text{Al}(\text{NO}_3)_3 \cdot 9\text{H}_2\text{O}$  was dissolved in 50 mL deionized water. After the dissolution completed, the solution was pumped dropwise ( $1 \text{ mL min}^{-1}$ ) into the beaker containing 50 mL of deionized water at  $65 \text{ }^\circ\text{C}$ .  $1.5 \text{ M Na}_2\text{CO}_3$  solution simultaneously was pumped dropwise, in order to keep the  $\text{pH} = 7$ . Then the obtained precipitates were aged at  $65 \text{ }^\circ\text{C}$  for 2 h. After that, the precipitation was washed with deionized water, followed by drying in an oven at  $80 \text{ }^\circ\text{C}$  overnight. Finally, the samples were calcined in a muffle furnace at  $350 \text{ }^\circ\text{C}$  for 4 h.

### 1.3 Catalysts characterization

Crystallographic characterization of all catalysts were identified using XRD (Rigaku SmartLab SE diffractometer) with  $\text{Cu K}\alpha$  radiation ( $\lambda = 1.5406 \text{ \AA}$ ) at 40 kV and 25 mA. The intensity data were recorded from  $10^\circ$  to  $90^\circ$  for  $2\theta$  Bragg angle at a scanning rate of  $5^\circ/\text{min}$ .

The  $\text{N}_2$  adsorption/desorption isotherms were measured on an ASAP 2020 (Micrometrics) instrument at  $-196 \text{ }^\circ\text{C}$ . Prior to analysis, about 150 mg of catalyst sample was pretreated under vacuum at  $300 \text{ }^\circ\text{C}$  for 6 h to remove moisture.

Elemental composition of the catalysts was determined on a iCAP 7000 series ICP-OES (Thermo Fisher Scientific, USA).

The reduction behavior of Cu-Zn-Ce oxide catalysts was investigated by temperature-programmed reduction ( $\text{H}_2$ -TPR) on Micromeritics AutoChem II 2920 instrument. Before analysis, approximately 100 mg catalyst was loaded in a quartz U-tube reactor and purged with Ar at  $300 \text{ }^\circ\text{C}$  for 30 min, followed by cooling to  $50 \text{ }^\circ\text{C}$ .

Then the gas stream was switched to 30 mL·min<sup>-1</sup> of 10% H<sub>2</sub>/Ar, and the temperature was raised at 10 °C/min to 400 °C. The H<sub>2</sub> consumption during temperature ramp was recorded by a thermal conductivity detector (TCD).

CO<sub>2</sub> temperature-programmed desorption (CO<sub>2</sub>-TPD) was conducted with similar processes. 100 mg catalyst was firstly pretreated in 10% H<sub>2</sub>/Ar at 300 °C for 2 h and then cooled in He to 50 °C. At 50 °C, the catalyst was exposed to 10% CO<sub>2</sub>/Ar for 30 min, followed by He purging for 60 min. Afterward, the temperature was slowly increased to 750 °C and recorded the TCD signal at the same time.

Scanning electron microscopy (SEM) was recorded on a Helios G4 CX to study the morphology of the catalysts. Transmission electron microscopy (TEM) images and HAADF-STEM images were acquired on a FEI Talos F200S G2 microscope at 200 kV (FEI, USA).

Semi-in situ XPS measurements were carried out on Thermo Scientific Escalab 250Xi spectrometer which was equipped with an Al K $\alpha$  X-ray source (E = 1486.6 eV) with a pass energy of 20 eV, providing an energy resolution of 0.05 eV. The catalyst was introduced into a preparation chamber, reduced in pure H<sub>2</sub> at 300 °C for 3 h and then down to room temperature for further testing. The binding energies were calibrated by environmental C 1s at 284.8 eV.

In-situ DRIFT spectra were performed in a FT-IR spectrometer (Bruker Vertex 70) with MCT detector and Harrick cell for observation at 250 °C as well as high pressure (3 MPa) environment. Typically, the catalyst was reduced in H<sub>2</sub> atmosphere at 300 °C for 3 h and purged with Ar for 30 min at 250 °C, followed by the background spectrum

collection at a resolution of  $4 \text{ cm}^{-1}$  for 32 scans. Subsequently, the catalysts were passed in  $\text{CO}_2/\text{H}_2$  (1: 3) at 3 MPa. The corresponding dynamic changes were recorded with absorb time.

#### 1.4 Catalysts performance

$\text{CO}_2$  hydrogenation was performed in a fixed bed reactor with 8 mm inner diameter. In a typical test, 0.5 g catalysts (40-60 mesh) diluted with 2.0 g quartz sand (40-60 mesh) were pretreated in 30 mL/min pure  $\text{H}_2$  at  $300 \text{ }^\circ\text{C}$  for 3 h. After the reactor was cooled down to  $250 \text{ }^\circ\text{C}$ , a reaction gas ( $\text{CO}_2: \text{H}_2: \text{Ar} = 24: 72: 4$ ) was introduced continuously to a pressure of 3.0 MPa. The contents of  $\text{CH}_4$ ,  $\text{CO}$ ,  $\text{CO}_2$  were detected by an online gas chromatograph (Shimazu, TCD, GC-2014) with a carbon molecular sieves column. The contents of  $\text{CH}_3\text{OH}$ ,  $\text{CH}_4$  were analyzed by an online gas chromatograph (Shimazu, FID, GC-2014) with a capillary column. The  $\text{CO}_2$  conversion ( $X_{\text{CO}_2}$ ), product selectivity ( $S_i$ ), and space-time yield of methanol ( $\text{STY}_{\text{Methanol}}$ ) were calculated as following:

$$X_{\text{CO}_2} (\%) = \frac{f_{\text{CO}_2,\text{in}}/f_{\text{Ar},\text{in}} - f_{\text{CO}_2,\text{out}}/f_{\text{Ar},\text{out}}}{f_{\text{CO}_2,\text{in}}/f_{\text{Ar},\text{in}}} \times 100\% \quad (1)$$

$$S_i (\%) = \frac{R_{i,m} \cdot f_i}{\sum_i R_{i,m} \cdot f_i} \times 100\% \quad (2)$$

$$\text{STY}_{\text{Methanol}} (\text{mol} \cdot \text{kg}_{\text{cat}}^{-1} \cdot \text{h}^{-1}) = \frac{F_{\text{CO}_2,\text{in}} \cdot X_{\text{CO}_2} \cdot S_{\text{Methanol}}}{W_{\text{cat}}} \quad (3)$$

Where  $R_{i,m}$  and  $f_i$  are the peak area of product  $i$  and the carbon molar response of product  $i$ , respectively;  $F_{\text{CO}_2,\text{in}}$  (mol/h) represents molar flow rate of  $\text{CO}_2$ ;  $W_{\text{cat}}$  is catalyst weight.

## 2. Supplementary tables and figures

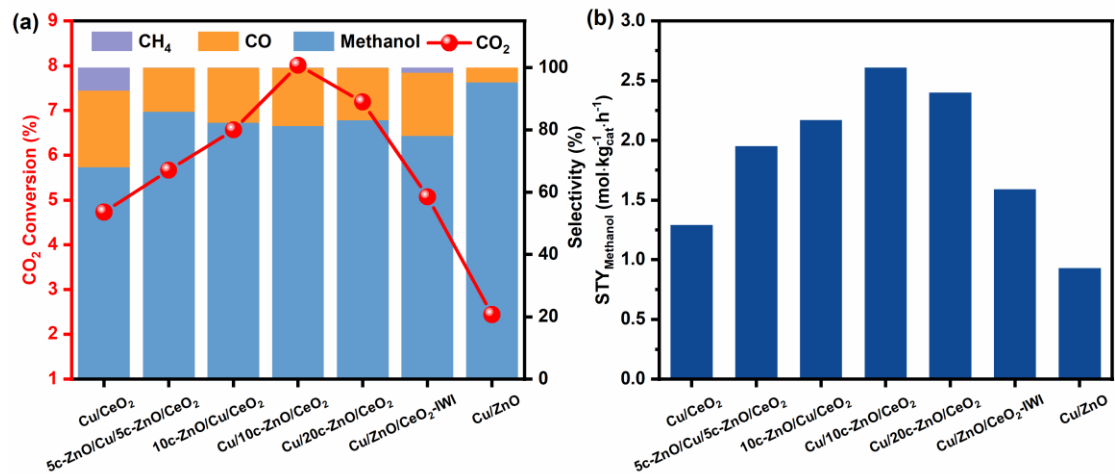

**Fig. S1** Catalytic performance of CO<sub>2</sub> hydrogenation over different Cu-based catalysts. (a) CO<sub>2</sub> conversion and product selectivity; (b) The space time yield (STY) of CH<sub>3</sub>OH. Reaction condition: 0.5 g catalysts, 3.0 MPa, 250 °C, CO<sub>2</sub>: H<sub>2</sub>: Ar = 24: 72: 4, 30 mL/min.

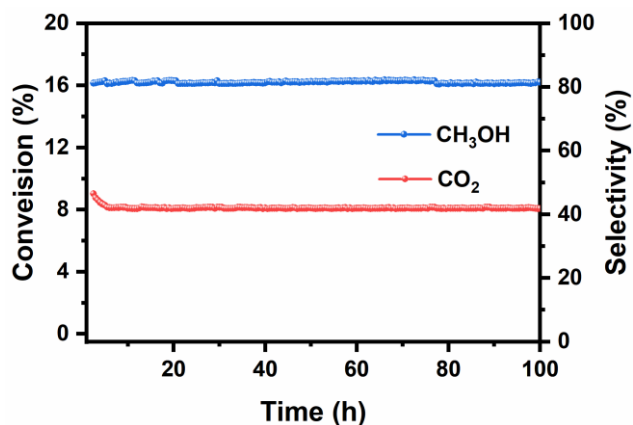

**Fig. S2** The CO<sub>2</sub> conversion and CH<sub>3</sub>OH selectivity with time for Cu/10c-ZnO/CeO<sub>2</sub>. Reaction condition: 0.5 g catalysts, 3.0 MPa, 250 °C, CO<sub>2</sub>: H<sub>2</sub>: Ar = 24: 72: 4, 30 mL/min.

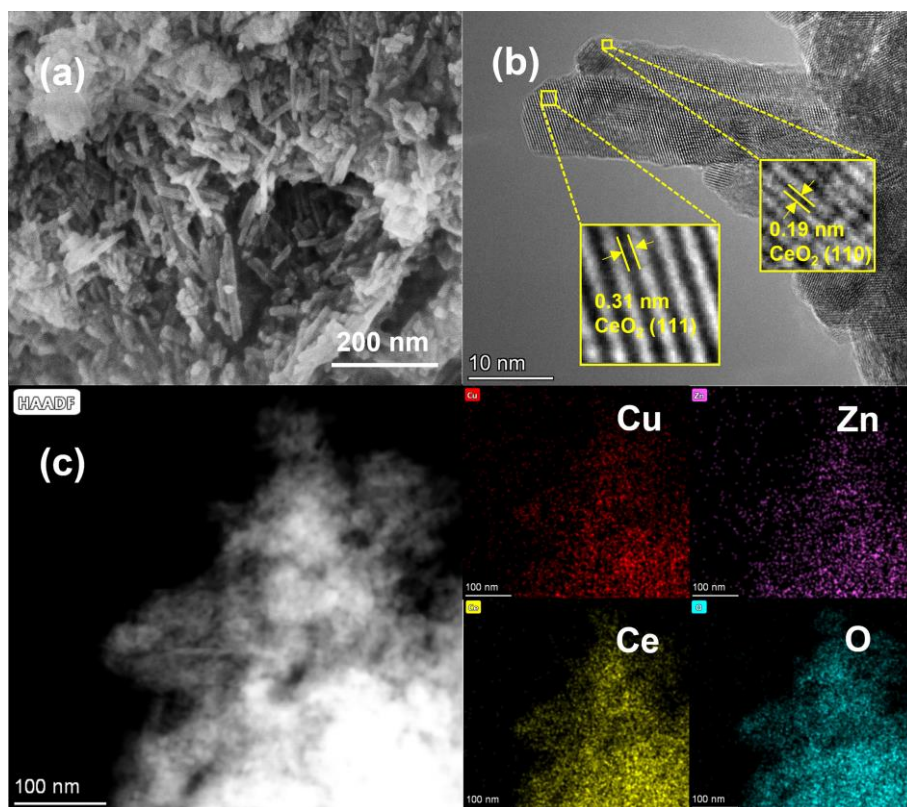

**Fig. S3** SEM and TEM analysis of spent Cu/10c-ZnO/CeO<sub>2</sub> catalyst. (a) SEM image; (b) HR-TEM image; (c) HAADF-STEM image and corresponding element mapping of Cu, Zn, Ce and O.



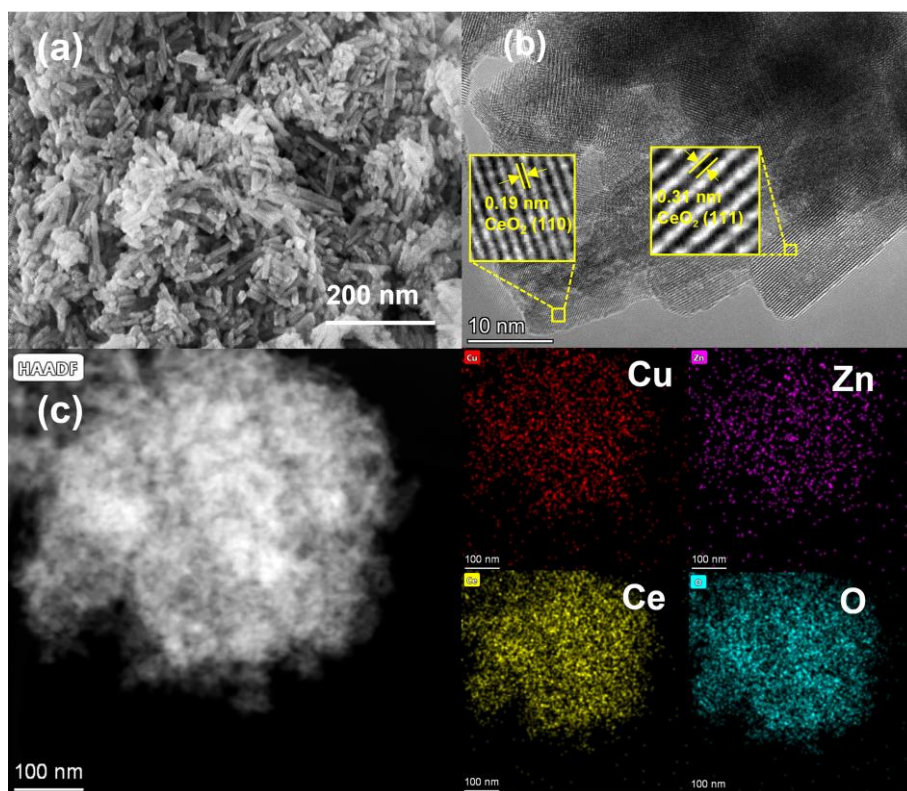

**Fig. S4** SEM and TEM analysis of 10c-ZnO/Cu/CeO<sub>2</sub> catalyst. (a) SEM image; (b) HR-TEM image;

(c) HAADF-STEM image and corresponding element mapping of Cu, Zn, Ce and O.

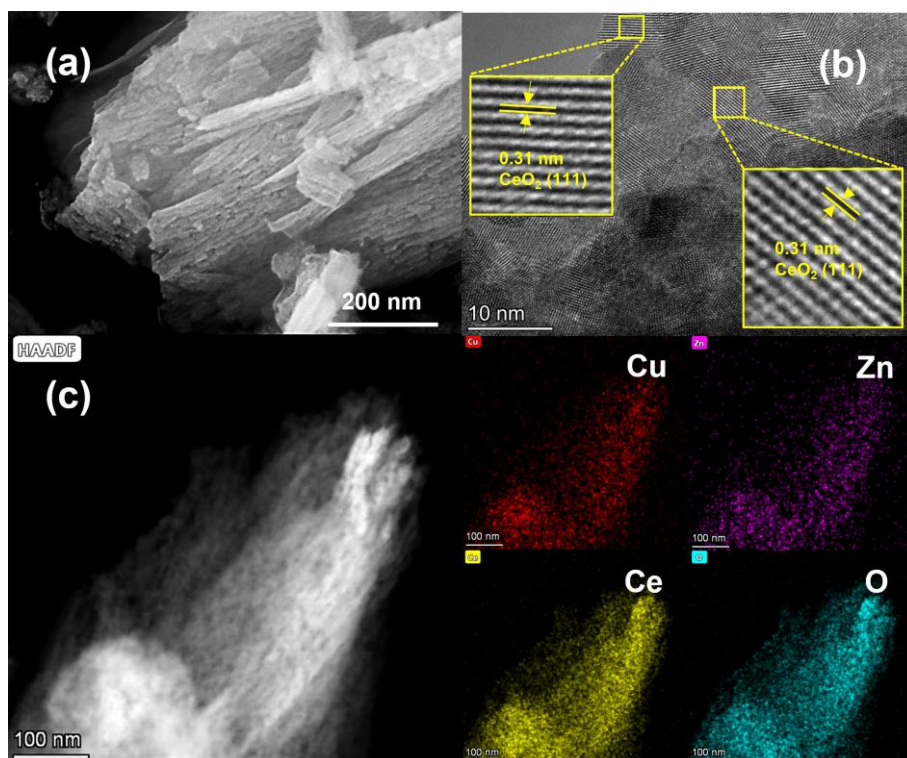

**Fig. S5** SEM and TEM analysis of Cu/ZnO/CeO<sub>2</sub>-co catalyst. (a) SEM image; (b) HR-TEM image; (c) HAADF-STEM image and corresponding element mapping of Cu, Zn, Ce and O.

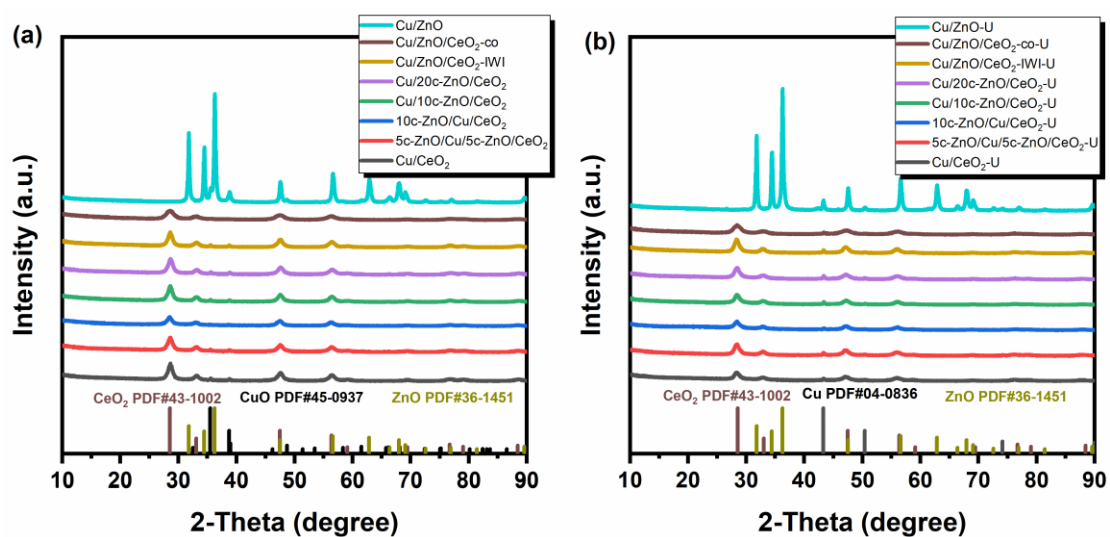

**Fig. S6** XRD patterns of different Cu-based catalysts. (a) fresh; (b) used.

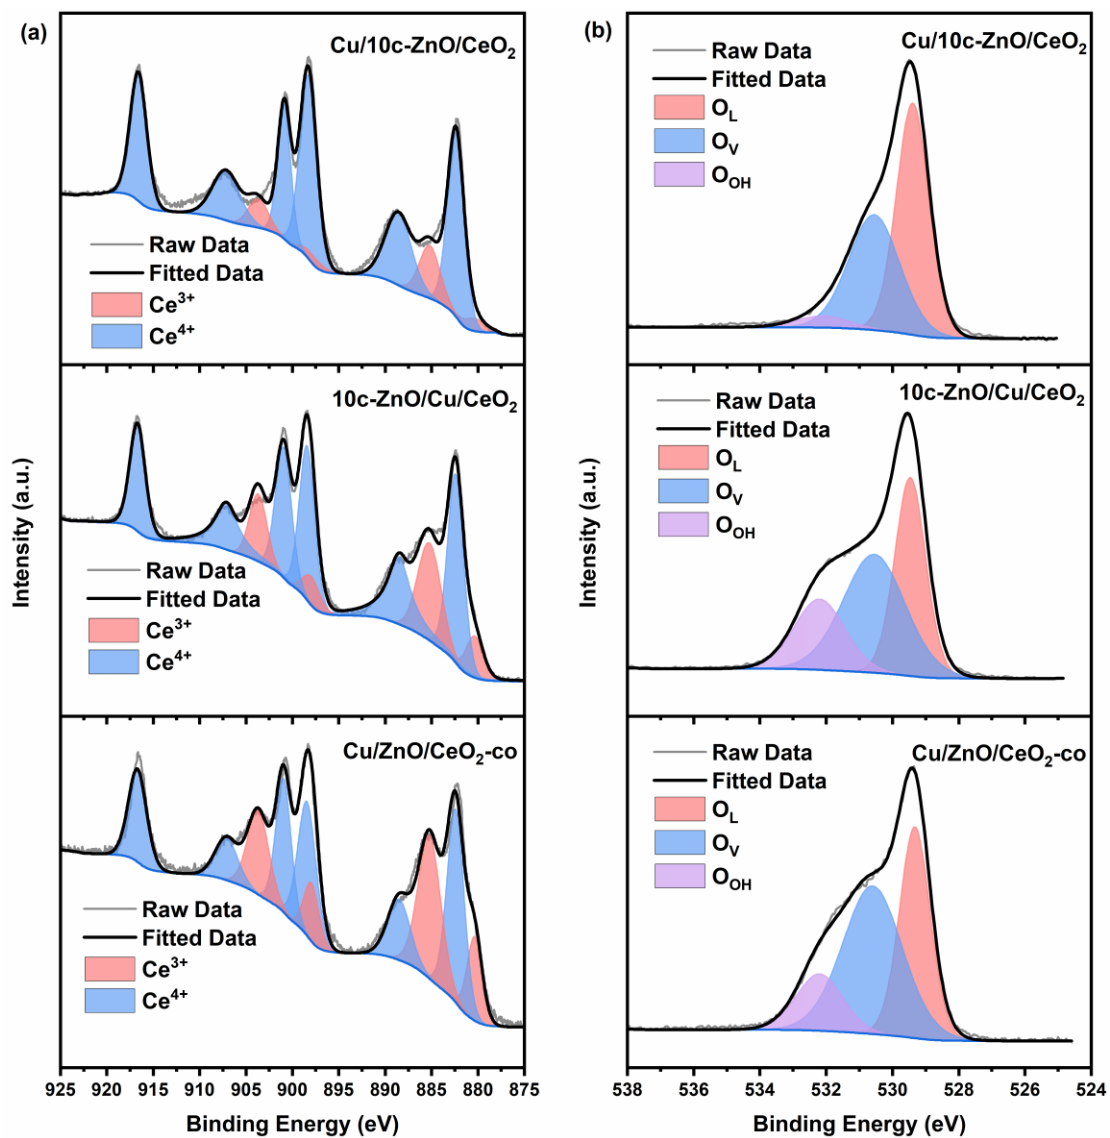

**Fig. S7** Semi-in situ XPS spectra of (a) Ce 3d; (b) O 1s over Cu/10c-ZnO/CeO<sub>2</sub>, 10c-ZnO/Cu/CeO<sub>2</sub> and Cu/ZnO/CeO<sub>2</sub>-co catalysts.

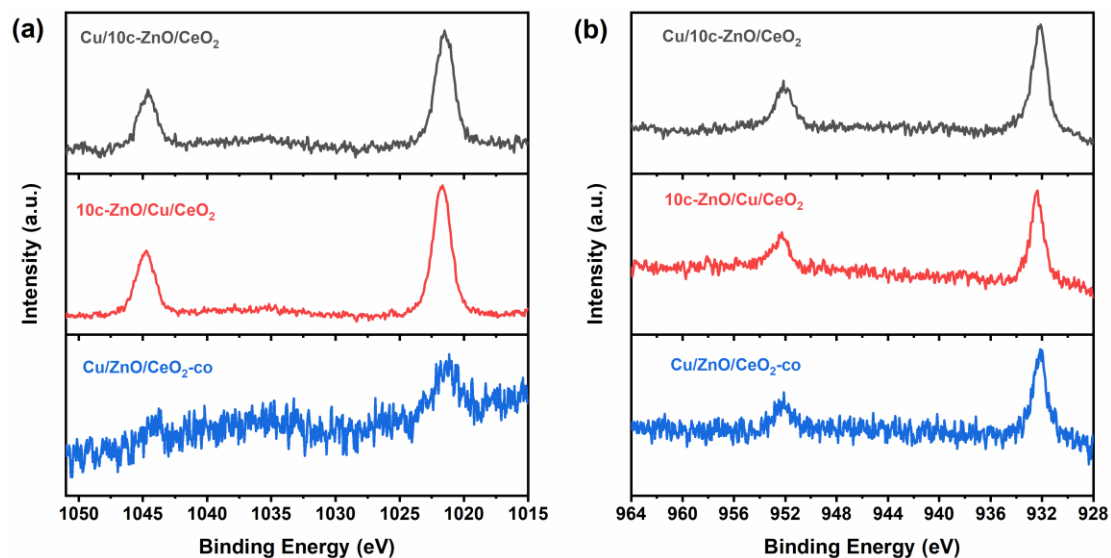

**Fig. S8** Semi-in situ XPS spectra of (a) Zn 2p and (b) Cu 2p over Cu/10c-ZnO/CeO<sub>2</sub>, 10c-ZnO/Cu/CeO<sub>2</sub> and Cu/ZnO/CeO<sub>2</sub>-co catalysts.

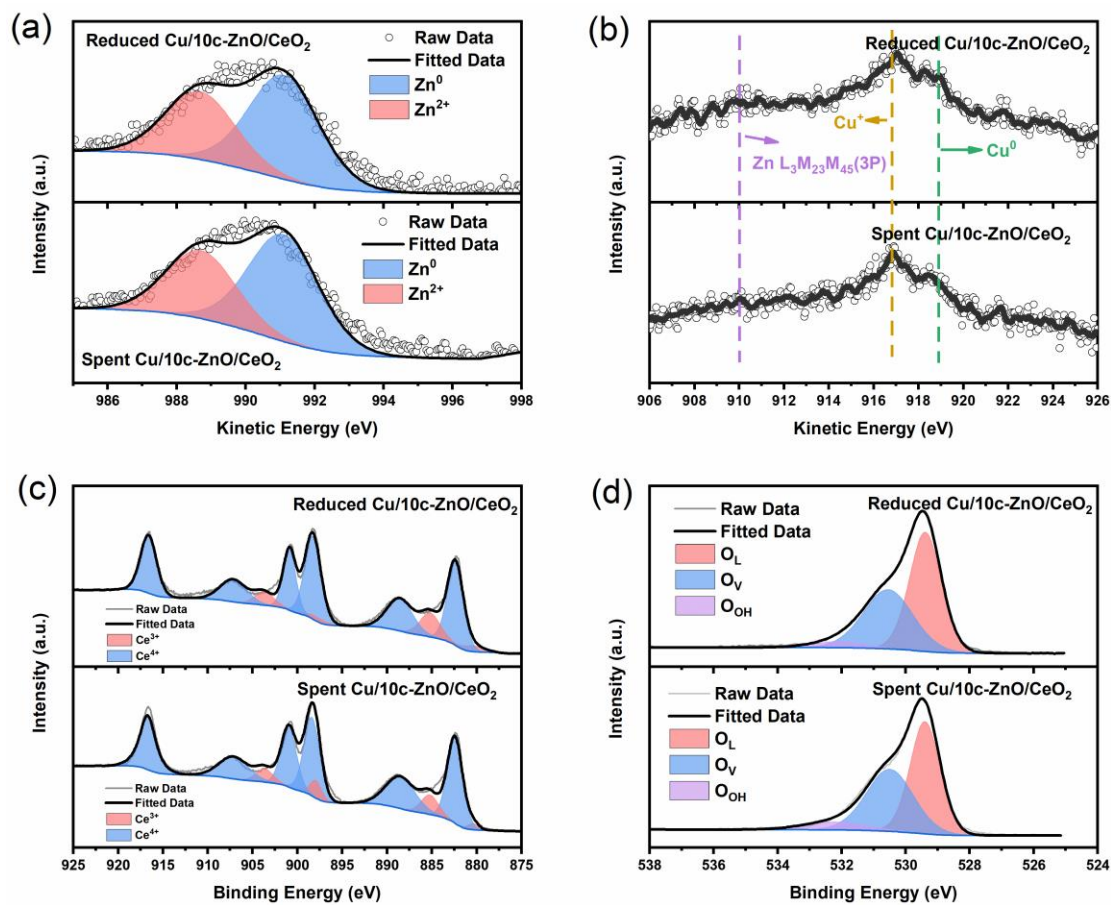

**Fig. S9** Semi-in situ XPS spectra of Cu/10c-ZnO/CeO<sub>2</sub> catalyst and XPS spectra of spent Cu/10c-ZnO/CeO<sub>2</sub> catalyst. (a) Zn LMM; (b) Cu LMM; (c) Ce 3d; (d) O 1s.

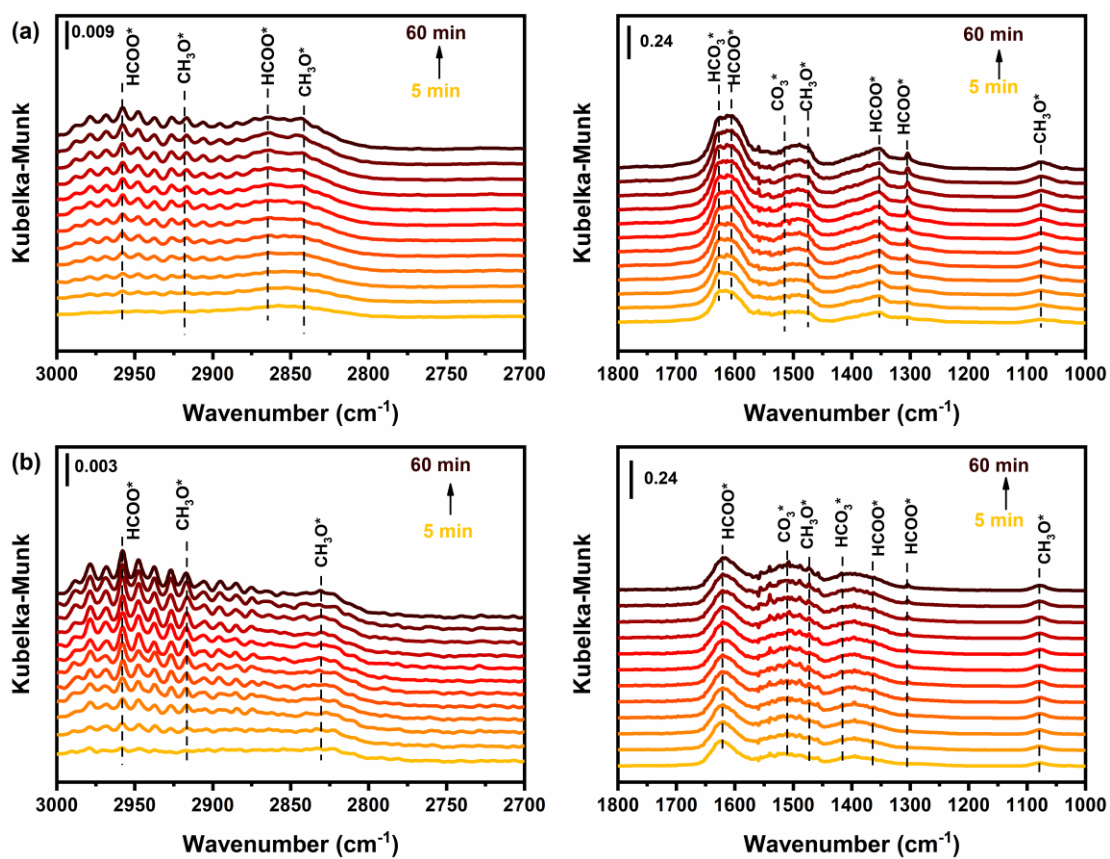

**Fig. S10** In-situ DRIFT spectra of CO<sub>2</sub> hydrogenation over different Cu-based catalysts. (a) 10c-ZnO/Cu/CeO<sub>2</sub>; (b) Cu/ZnO/CeO<sub>2</sub>-co. Conditions: 3.0 MPa, 250 °C.

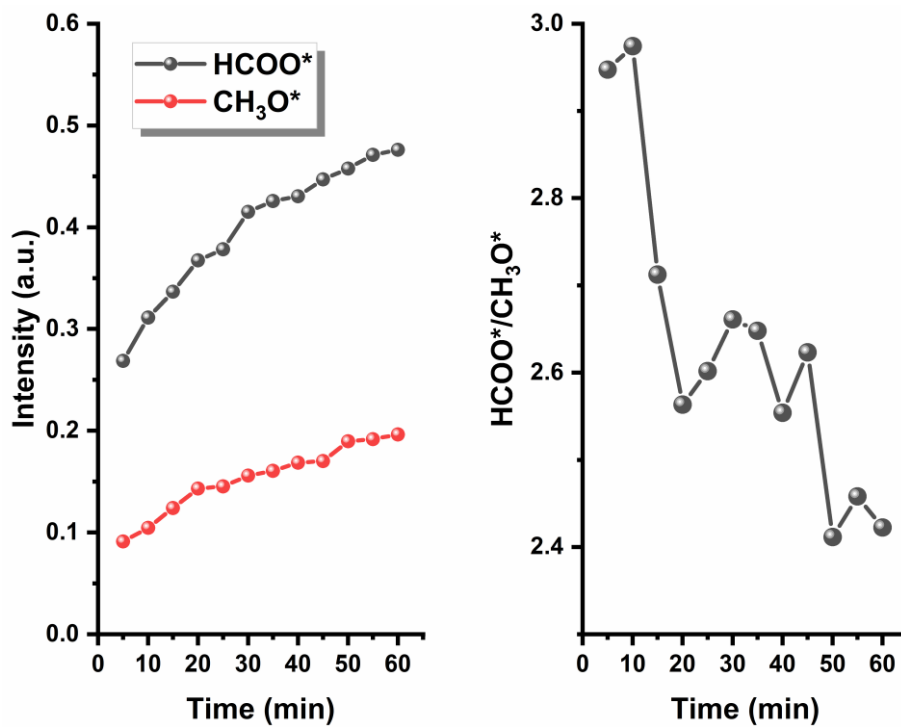

**Fig. S11** The time-dependent curves of HCOO\* and CH<sub>3</sub>O\* active intermediates on Cu/10c-

ZnO/CeO<sub>2</sub> catalyst.

**Table S1** The Cu and Zn loadings of Cu-Zn-Ce oxide catalysts.

| Catalyst                    | Cu loading <sup>a</sup> (wt.%) | Zn loading <sup>a</sup> (wt.%) |
|-----------------------------|--------------------------------|--------------------------------|
| Cu/10c-ZnO/CeO <sub>2</sub> | 9.74                           | 0.66                           |
| 10c-ZnO/Cu/CeO <sub>2</sub> | 9.78                           | 0.66                           |
| Cu/ZnO/CeO <sub>2</sub> -co | 9.87                           | 0.63                           |

<sup>a</sup>Measured by ICP-OES.

**Table S2** Comparison of different Cu-baesd catalysts for CO<sub>2</sub> hydrogenation to methanol.

| Catalysts                                   | Cu loading (wt.%) | Temperature/Pressure (°C/MPa) | WHSV (mL g <sub>cat</sub> <sup>-1</sup> h <sup>-1</sup> ) | CO <sub>2</sub> Conversion (%) | CH <sub>3</sub> OH Selectivity (%) | STY (mol <sub>MeOH</sub> kg <sub>cat</sub> <sup>-1</sup> h <sup>-1</sup> ) | STY (mmol <sub>MeOH</sub> g <sub>Cu</sub> <sup>-1</sup> h <sup>-1</sup> ) | Ref.      |
|---------------------------------------------|-------------------|-------------------------------|-----------------------------------------------------------|--------------------------------|------------------------------------|----------------------------------------------------------------------------|---------------------------------------------------------------------------|-----------|
| 4CZA-AE                                     | 4                 | 220/3.0                       | 9000 <sup>a</sup>                                         | 12.3                           | 97.2                               | 9.9                                                                        | 247.7                                                                     | 3         |
| ZnO/Cu/Al <sub>2</sub> O <sub>3</sub> -PCVD | 5                 | 250/3.0                       | 31200                                                     | 1.2                            | 65.5                               | 2.79                                                                       | 55.8                                                                      | 4         |
| 33Cu/ZnFe-0.5                               | 33                | 260/4.5                       | 21600                                                     | 9.4                            | 71.6                               | 15.9                                                                       | 48.3                                                                      | 5         |
| Cu/CeW <sub>0.25</sub> O <sub>x</sub>       | 10                | 250/3.5                       | 7500                                                      | 13                             | 87                                 | 12.3                                                                       | 123.1                                                                     | 6         |
| Cu/ZnO@UiO-66                               | 5.86              | 250/4.0                       | 18000 <sup>a</sup>                                        | 3.0                            | 87.5                               | 3.0                                                                        | 51.8                                                                      | 7         |
| Cu/ZnO/Al <sub>2</sub> O <sub>3</sub>       | 50.13             | 250/4.0                       | 12000 <sup>a</sup>                                        | 9.72                           | 47.2                               | 3.6                                                                        | 7.2                                                                       | 7         |
| Cu/10c-ZnO/CeO <sub>2</sub>                 | 10                | 250/3.0                       | 3600                                                      | 8.1                            | 79.9                               | 2.6                                                                        | 26                                                                        | this work |
| Cu/10c-ZnO/CeO <sub>2</sub>                 | 10                | 250/3.0                       | 18000                                                     | 3.3                            | 86.1                               | 5.7                                                                        | 57                                                                        | this work |

WHSV = mass flow rate/catalyst mass, mL g<sub>cat</sub><sup>-1</sup> h<sup>-1</sup>

<sup>a</sup> GHSV = volume flow rate/bed volume, h<sup>-1</sup>

STY (mmol g<sub>Cu</sub><sup>-1</sup> h<sup>-1</sup>): the methanol production is referred to in terms of grams of copper

**Table S3** Semi-in situ XPS quantitative results of Cu-based catalysts.

| Catalyst                          | Zn <sup>0</sup> /Zn<br>(at/at) | O <sub>v</sub> /O<br>(at/at) | Ce <sup>3+</sup> /Ce<br>(at/at) | Atomic% |     |      |      |
|-----------------------------------|--------------------------------|------------------------------|---------------------------------|---------|-----|------|------|
|                                   |                                |                              |                                 | Cu      | Zn  | Ce   | O    |
| Cu/10c-ZnO/CeO <sub>2</sub>       | 60.6                           | 41.9                         | 14.1                            | 4.7     | 2.6 | 23.9 | 68.8 |
| 10c-ZnO/Cu/CeO <sub>2</sub>       | 48.2                           | 42.9                         | 26.5                            | 3.5     | 3.9 | 19.0 | 73.6 |
| Cu/ZnO/CeO <sub>2</sub> -co       | 25.4                           | 49.1                         | 37.8                            | 2.8     | 1.1 | 20.8 | 75.3 |
| Spent Cu/10c-ZnO/CeO <sub>2</sub> | 61.3                           | 43.3                         | 12.2                            | 4.6     | 2.8 | 24.4 | 68.2 |

**Table S4** The amount of CO<sub>2</sub> desorption of Cu-Zn-Ce oxide catalysts.

| Catalyst                    | Region $\alpha$                                    | Region $\beta$                                     |
|-----------------------------|----------------------------------------------------|----------------------------------------------------|
|                             | CO <sub>2</sub> desorption (mmol g <sup>-1</sup> ) | CO <sub>2</sub> desorption (mmol g <sup>-1</sup> ) |
| Cu/10c-ZnO/CeO <sub>2</sub> | 20.3                                               | 12.5                                               |
| 10c-ZnO/Cu/CeO <sub>2</sub> | 11.2                                               | 46.8                                               |
| Cu/ZnO/CeO <sub>2</sub> -co | 10.3                                               | 53.7                                               |

## References

1. H.-X. Mai, L.-D. Sun, Y.-W. Zhang, R. Si, W. Feng, H.-P. Zhang, H.-C. Liu and C.-H. Yan, *J. Phys. Chem. B*, 2005, **109**, 24380-24385.
2. H. Zhao, R. Yu, S. Ma, K. Xu, Y. Chen, K. Jiang, Y. Fang, C. Zhu, X. Liu, Y. Tang, L. Wu, Y. Wu, Q. Jiang, P. He, Z. Liu and L. Tan, *Nat. Catal.*, 2022, **5**, 818-831.
3. S. Wang, L. Song and Z. Qu, *Chem. Eng. J.*, 2023, **469**, 144008.
4. S. Saedy, M. A. Newton, M. Zabilskiy, J. H. Lee, F. Krumeich, M. Ranocchiari and J. A. van Bokhoven, *Catal. Sci. Technol.*, 2022, **12**, 2703-2716.
5. T. Liu, D. Xu, D. Wu, G. Liu and X. Hong, *ACS Sustain. Chem. Eng.*, 2021, **9**, 4033-4041.
6. Y. Yan, R. J. Wong, Z. Ma, F. Donat, S. Xi, S. Saqline, Q. Fan, Y. Du, A. Borgna, Q. He, C. R. Müller, W. Chen, A. A. Lapkin and W. Liu, *Appl. Catal. B*, 2022,

**306**, 121098.

7. Y. Yang, Y. Xu, H. Ding, D. Yang, E. Cheng, Y. Hao, H. Wang, Y. Hong, Y. Su, Y. Wang, L. Peng and J. Li, *Catal. Sci. Technol.*, 2021, **11**, 4367-4375.
